# ***SWELL1* is a glucose sensor required for $\beta$ -cell excitability and insulin secretion**

Chen Kang<sup>1</sup>, Susheel K. Gunasekar<sup>1</sup>, Anil Mishra<sup>1</sup>, Litao Xie<sup>1</sup>, Yanhui Zhang<sup>1</sup>, Saachi Pai<sup>1</sup>, Yiwen Gao<sup>1</sup>, Andrew W. Norris<sup>2,3</sup>, Samuel B. Stephens<sup>1,3</sup>, Rajan Sah<sup>1,3,4</sup>

<sup>1</sup>Department of Internal Medicine, Division of Cardiovascular Medicine, University of Iowa, Carver College of Medicine, Iowa City, IA, 52242

<sup>2</sup>Department of Pediatrics, University of Iowa, Carver College of Medicine, Iowa City, IA, 52242

<sup>3</sup>Fraternal Order of the Eagles Diabetes Research Center, Iowa City, IA, 52242

<sup>4</sup>Abboud Cardiovascular Research Center, University of Iowa, Carver College of Medicine, Iowa City, IA, 52242

**\* Corresponding Author:**  
**Dr. Rajan Sah**  
**169 Newton Rd. PBDB 4334**  
**Iowa City, Iowa 52242**  
**Phone: 319-353-5660 Email: [rajan-sah@uiowa.edu](mailto:rajan-sah@uiowa.edu)**

## Abstract

Insulin secretion from the pancreatic  $\beta$ -cell is initiated by activation of voltage-gated  $\text{Ca}^{2+}$  channels (VGCC) to trigger  $\text{Ca}^{2+}$ -mediated insulin vesicle fusion with the  $\beta$ -cell plasma membrane. The firing of VGCC depends on the  $\beta$ -cell membrane potential, which is in turn mediated by the balance of depolarizing (excitatory) and hyperpolarizing (inhibitory) ionic currents<sup>1-3</sup>. While much attention has focused on inhibitory potassium currents<sup>4-10</sup> there is little knowledge about the excitatory currents required to depolarize the  $\beta$ -cell, including the molecular identity of these excitatory currents<sup>3</sup>. Here we show that SWELL1 (LRRC8a) mediates a swell-activated, depolarizing chloride current ( $I_{\text{Cl,SWELL}}$ ) in  $\beta$ -cells. Hypotonic and glucose-stimulated  $\beta$ -cell swelling activates SWELL1-mediated  $I_{\text{Cl,SWELL}}$  and this is required for both glucose-stimulated and hypotonic swell-mediated activation of VGCC-dependent intracellular calcium signaling in  $\beta$ -cells. SWELL1 KO MIN6 cells and  $\beta$ -cell targeted SWELL1 KO murine islets exhibit significantly impaired glucose-stimulated insulin secretion, with preserved insulin content *in vitro*. Tamoxifen-inducible  $\beta$ -cell targeted *SWELL1* KO mice have normal fasting insulin levels but display markedly impaired glucose-stimulated insulin secretion. Our results reveal a physiological role for SWELL1 as a glucose sensor - linking glucose-mediated  $\beta$ -cell swelling to SWELL1-dependent activation of VGCC-triggered calcium signaling, and highlights SWELL1-mediated “swell-secretion” coupling as required for glucose-stimulated insulin secretion.

## 49 MAIN

50 Recent studies have identified SWELL1 (LRRC8a) as a required component of a swell-activated Cl<sup>-</sup>  
51 current  $I_{Cl,SWELL}$  or **Volume-Regulated Anion Current (VRAC)** in common cell lines<sup>11, 12</sup>, forming  
52 multimeric channels with LRRC8b-e<sup>13</sup>. To determine if SWELL1 is also required for VRAC in pancreatic  
53  $\beta$ -cells we suppressed SWELL1 in mouse insulinoma (MIN6) cells by adenoviral transduction with an  
54 shRNA-directed against SWELL1 (Ad-U6-shSWELL1-mCherry; [Fig. 1a](#)) as compared to a scrambled  
55 shRNA control (Ad-U6-shSCR-mCherry). We observed robust knock-down of SWELL1 protein ([Fig.](#)  
56 [1b](#)) and a significant reduction in hypotonic swell-activated VRAC in Ad-shSWELL1 relative to Ad-  
57 shSCR transduced MIN6 cells ([Fig. 1c&d](#)). To determine whether SWELL1 is also required for VRAC in  
58 mouse primary  $\beta$ -cells we isolated islets from *SWELL1* floxed mice (*SWELL1*<sup>f/f</sup>)<sup>14</sup> and transduced them  
59 with an adenovirus expressing GFP under control of a rat insulin promoter (Ad-RIP2-GFP) to allow  
60 positive identification of  $\beta$ -cells (GFP+ cells). *SWELL1*<sup>f/f</sup> islets were further treated with adenovirus  
61 expressing Cre-mCherry to allow Cre-mediated excision of the floxed SWELL1 allele or control virus  
62 expressing mCherry alone ([Supplementary Fig. 1a](#)). By selecting GFP+/mCherry+ cells, we are able to  
63 patch-clamp either control WT  $\beta$ -cells (*SWELL1*<sup>f/f</sup>  $\beta$ -cells) or *SWELL1* KO  $\beta$ -cells (*SWELL1*<sup>f/f</sup>/Cre  $\beta$ -cells;  
64 [Fig. 1e](#)). We find that WT  $\beta$ -cells express substantial swell-activated current and this is entirely  
65 abolished upon Cre-mediated recombination in *SWELL1* KO  $\beta$ -cells ([Fig. 1f-h](#)). We next tested whether  
66 SWELL1 is also required for VRAC in human  $\beta$ -cells and applied a similar approach. We transduced  
67 human islets with Ad-RIP2-GFP and Ad-shSWELL1-mCherry or Ad-sh-SCR-mCherry ([Supplementary](#)  
68 [Fig. 1b](#)), in order to isolate and patch-clamp human  $\beta$ -cells (GFP+) subjected to shRNA-mediated  
69 SWELL1 KD or to a scrambled control (GFP+/mCherry+; [Fig. 1i](#)). Similar to mouse  $\beta$ -cell recordings we  
70 find that human  $\beta$ -cells also express significant SWELL1-mediated swell-activated current ([Fig. 1j-l](#)).  
71 Indeed, in all  $\beta$ -cells patch-clamped, the reversal potential was ~-12 mV, which is near the reversal  
72 potential for Cl<sup>-</sup> under our recording conditions, and thus consistent with SWELL1-mediating a swell-  
73 activated Cl<sup>-</sup> conductance in  $\beta$ -cells<sup>15-17</sup>. These data demonstrate that SWELL1 is required for VRAC or  
74  $I_{Cl,SWELL}$  in pancreatic  $\beta$ -cells.

Having established that SWELL1 is required for this previously enigmatic depolarizing swell-activated  $\text{Cl}^-$  current<sup>16, 17</sup> in MIN6 cells, and in both mouse and human primary  $\beta$ -cells we asked whether physiologic glucose-mediated  $\beta$ -cell swelling<sup>18</sup> is sufficient to activate SWELL1-mediated VRAC. First, we measured  $\beta$ -cell size by light microscopy in WT and SWELL1-deficient primary murine and human  $\beta$ -cells in response to glucose-stimulated swelling (at 35-37°C). WT murine  $\beta$ -cells swell  $6.8 \pm 1.6$  % in cross-sectional area upon perfusion of 16.7 mM glucose (from 1 mM basal glucose) and reach a maximum size at 12 minutes post glucose-stimulation, followed by a reduction in  $\beta$ -cell size (Fig. 2a), consistent with regulatory volume decrease (RVD). In contrast, SWELL1 KO murine  $\beta$ -cells swell monotonically to  $8.2 \pm 2.4$  % and exhibit no RVD (Fig. 2a). WT human  $\beta$ -cells show a similar trend, swelling  $8.6 \pm 3.5$  %, followed by RVD (Fig. 2b). SWELL1 KD human  $\beta$ -cells swell monotonically to  $6.0 \pm 1.5$  % (Fig. 2b), and similar to SWELL1 KO murine  $\beta$ -cells (Fig. 2a), exhibit no RVD. These data indicate that physiological increases in glucose induce  $\beta$ -cell swelling and that SWELL1 is required for RVD in primary  $\beta$ -cells, as observed in cell lines<sup>11, 12, 19</sup>. Next, we applied the perforated-patch clamp technique to primary  $\beta$ -cells at 35-37°C in order to measure currents under the same physiological conditions that induce glucose-mediated  $\beta$ -cell swelling. We find that  $\beta$ -cell VRAC activates in response to physiological increases in glucose in MIN6 cells (Supplementary Fig. 2) and in both mouse (Fig. 2c-d) and human (Fig. 2e-f)  $\beta$ -cells, and is blocked by the selective VRAC inhibitor, DCPIB. Importantly, the time-course of VRAC activation in  $\beta$ -cells either tracks or lags the latency of  $\beta$ -cell swelling in response to stimulatory glucose (~8 minutes), consistent with a mechanism of glucose-mediated  $\beta$ -cell swell-activation of SWELL1-mediated VRAC. Thus, SWELL1-mediates a glucose-sensitive swell-activated depolarizing  $\text{Cl}^-$  current in  $\beta$ -cells.

To determine whether SWELL1-mediated depolarizing  $\text{Cl}^-$  current is required to depolarize the  $\beta$ -cell membrane potential to the activation threshold of voltage-gated  $\text{Ca}^{2+}$  channels (VGCC) essential for insulin granule fusion, we next measured glucose-stimulated intracellular  $\text{Ca}^{2+}$  in WT and SWELL1 - deficient MIN6  $\beta$ -cells, primary mouse and human  $\beta$ -cells. Using CRISPR/cas9 technology, we generated multiple SWELL1 KO MIN6 cell lines (Supplementary Fig. 3), confirming *SWELL1* gene

disruption by PCR ([Supplementary Fig. 3a](#)), SWELL1 protein deletion ([Fig. 3a & Supplementary Fig. 3b](#)) and ablation of SWELL1-mediated current ([Fig. 3b](#)) in these cells. We find that glucose-stimulated  $\text{Ca}^{2+}$  transients are entirely abolished in SWELL1 KO MIN6 compared to WT cells ([Fig. 3c-e](#)), despite preserved KCl (40 mM) stimulated  $\text{Ca}^{2+}$  transients (control for intact  $\beta$ -cell excitability). Co-application of a selective VGCC blocker nifedipine (10  $\mu\text{M}$ ) fully inhibits these glucose-stimulated  $\text{Ca}^{2+}$  transients in WT MIN6 cells, consistent with a mechanism of membrane depolarization and VGCC activation ([Supplementary Fig. 4a&b](#)).

As  $\beta$ -cells are also known to depolarize, fire  $\text{Ca}^{2+}$  transients, and secrete insulin via a glucose-independent hypotonic swelling mechanism<sup>16, 20</sup>, we next examined swell-induced  $\text{Ca}^{2+}$ -signaling in  $\beta$ -cells in response to hypotonic stimulation (220 mOsm) in the absence of glucose-stimulation (0 mM glucose). We find that hypotonic swelling alone can trigger robust  $\text{Ca}^{2+}$  transients in WT MIN6 cells ([Fig. 3f&h](#)) and these elevations in cytosolic  $\text{Ca}^{2+}$  recover rapidly upon restoration of isotonic solution ([Fig. 3f](#)). In contrast, SWELL1 KO MIN6 cells are entirely non-responsive to hypotonic swelling induced  $\text{Ca}^{2+}$  transients ([Fig. 3f-h](#)), despite preserved KCl stimulated  $\text{Ca}^{2+}$  responses, consistent with SWELL1-mediated a glucose-independent, swell-activated depolarizing current in  $\beta$ -cells. Similar to the case with glucose-stimulated  $\text{Ca}^{2+}$  signaling, we also find that hypotonic swelling triggered  $\text{Ca}^{2+}$  transients are fully inhibited by VGCC blockade ([Supplementary Fig. 4c&d](#)), implicating  $\beta$ -cell membrane depolarization followed by VGCC activation, as opposed to alternative hypo-osmotically activated  $\text{Ca}^{2+}$  influx pathways (i.e. TRP channels)<sup>21</sup>.

We next examined SWELL1-dependent  $\text{Ca}^{2+}$  signaling in primary mouse and human  $\beta$ -cells. We generated adenoviruses expressing the genetically encoded  $\text{Ca}^{2+}$ -sensor GCaMP6s under control of the rat insulin promoter 1 (RIP1), either alone (Ad-RIP1-GCaMP6s), or in combination with Cre-recombinase (Ad-RIP1-Cre-P2A-GCaMP6s). This approach provides a robust  $\beta$ -cell restricted fluorescent  $\text{Ca}^{2+}$  sensor while simultaneously allowing for  $\beta$ -cell targeted Cre-mediated *SWELL1* deletion in cultured *SWELL1*<sup>fl/fl</sup> islets isolated from *SWELL1*<sup>fl/fl</sup> mice ([Fig. 3i](#)). GCaMP6s  $\text{Ca}^{2+}$  imaging reveals robust glucose-stimulated  $\text{Ca}^{2+}$  transients in freshly dissociated WT primary murine  $\beta$ -cells (Ad-

RIP1-GCaMP6s/*SWELL1*<sup>fl/fl</sup>; Fig. 3j&l) and these are significantly suppressed in *SWELL1* KO  $\beta$ -cells (Ad-RIP1-Cre-P2A-GCaMP6s/*SWELL1*<sup>fl/fl</sup>; Fig. 3k&l), despite preserved KCl stimulated  $\text{Ca}^{2+}$  responses. We used a similar approach in human islets, whereby we co-transduced islets with Ad-RIP1-GCaMP6s (Fig. 3m) and either Ad-U6-sh*SWELL1*-mCherry or Ad-U6-shSCR-mCherry. Upon islet dissociation, we imaged only double-labelled GCaMP6s+/mCherry+ primary human  $\beta$ -cells. As with mouse primary  $\beta$ -cells, we observe robust glucose-stimulated  $\text{Ca}^{2+}$  transients in Ad-shSCR treated human primary  $\beta$ -cells (Fig. 3n&p) and this is markedly abrogated upon Ad-sh*SWELL1*-mediated *SWELL1* knock-down (Fig. 3o&p). Collectively, these data demonstrate that *SWELL1* is required for both glucose- and swell-activated  $\text{Ca}^{2+}$  signaling in MIN6 cells and in mouse and human primary  $\beta$ -cells. Moreover, these data suggest that the depolarizing *SWELL1*-mediated  $\text{Cl}^-$  current is necessary for  $\beta$ -cell depolarization in response to glucose-stimulation. In pancreatic  $\beta$ -cells, physiological intracellular  $\text{Cl}^-$  concentration is maintained at 34-36 mM<sup>22, 23</sup> by NKCC1 transporters<sup>24, 25</sup> to generate a depolarizing  $\text{Cl}^-$  current upon activation of a  $\text{Cl}^-$  conductance, since  $E_{\text{Cl}^-} = \sim -35$  mV. Therefore, NKCC1 blockade by bumetanide<sup>26, 27</sup> is predicted to reduce intracellular  $\text{Cl}^-$ , drop  $E_{\text{Cl}^-}$  and thereby diminish or abolish  $\beta$ -cell membrane depolarization by a *SWELL1*-mediated glucose-stimulated  $\text{Cl}^-$  conductance. Consistent with this prediction, we find that application of bumetanide (10  $\mu\text{M}$ ) fully inhibits glucose-stimulated  $\text{Ca}^{2+}$  signaling in both WT MIN6 cells (Supplementary Fig. 4e&f) and WT primary murine  $\beta$ -cells (Supplementary Fig. 4g&h).

To determine the impact of *SWELL1*-dependent glucose-stimulated  $\text{Ca}^{2+}$  signaling on insulin secretion in  $\beta$ -cells we measured glucose-stimulated insulin secretion (GSIS) in WT and *SWELL1* KO MIN6 cells. We find that the glucose-dependent increase in insulin secretion in WT MIN6 cells is significantly diminished in *SWELL1* KO MIN6 cells (Fig. 4a), particularly at higher glucose concentration (30 mM), despite no change in total insulin content (Fig. 4b). We next isolated islets from *SWELL1*<sup>fl/fl</sup> mice followed by transduction with either Ad-RIP1-RFP (WT) or Ad-RIP1-Cre-P2A-RFP (*SWELL1* KO; Fig. 4c). Similar to MIN6 cells, we note a significant reduction in GSIS (16.7 mM glucose) in *SWELL1*

KO compared to WT islets (Fig. 4d), despite relatively preserved L-arginine stimulated insulin secretion (Fig. 4d), and similar total insulin content (Fig. 4e).

We next generated tamoxifen-inducible  $\beta$ -cell-targeted *SWELL1* KO mice by crossing *SWELL1<sup>fl/fl</sup>* mice with *Ins1Cre<sup>ERT2</sup>* mice (*KO Ins1Cre<sup>ERT2</sup>*, Fig. 4f)<sup>28</sup> to examine the requirement of  $\beta$ -cell *SWELL1* for insulin secretion *in vivo*. After tamoxifen-administration (40-80 mg/kg/day x 5 days), we observe pancreas-restricted *SWELL1* recombination in *KO Ins1Cre<sup>ERT2</sup>* mice by PCR across *SWELL1* Exon 3 (426 bp amplicon; Fig. 4g) and complete ablation of *SWELL1*-mediated current in 80% of patch-clamped  $\beta$ -cells (8/10 cells; Fig. 4h-i), while 100% of  $\beta$ -cells from tamoxifen-induced *SWELL1<sup>fl/fl</sup>* (WT) had robust hypotonically-activated *SWELL1*-mediated currents (4/4 cells). We find that basal (fasting) serum insulin are similar between WT and *KO Ins1Cre<sup>ERT2</sup>* mice (Fig. 4j), which is consistent with preserved basal insulin secretion observed at low glucose *in vitro* in *SWELL1* KO MIN6 cells (Fig. 4a) and in  $\beta$ -cell-targeted *SWELL1* KO murine islets (Fig. 4d). However, with glucose-stimulation (2 g/kg i.p.) we find that insulin secretion is significantly impaired in *KO Ins1Cre<sup>ERT2</sup>* mice compared to WT mice (Fig. 4j). Overall, these data are consistent with a requirement of  $\beta$ -cell *SWELL1* for glucose-stimulated,  $\text{Ca}^{2+}$ -dependent insulin secretion both *in vitro* and *in vivo*.

$\text{VRAC}/\text{I}_{\text{Cl,SWELL}}$  has been studied for decades through electrophysiological recordings in numerous cell types<sup>29-31</sup>, but only recently has it been discovered that *SWELL1*/LRRC8a, and associated LRRC8 isoforms b-e, form the VRAC channel complex in common cell lines<sup>11-13</sup>. Accordingly, the physiological role of *SWELL1*-mediated VRAC in primary cells remains unexplored. We recently showed that *SWELL1* is required for VRAC in adipocytes where it senses adipocyte hypertrophy in the setting of obesity and regulates insulin-PI3K-AKT2-GLUT4 mediated glucose uptake and systemic glycemia<sup>32</sup>. Here we asked whether *SWELL1* is required for VRAC described previously in the pancreatic  $\beta$ -cell<sup>16-18</sup> and whether the VRAC hypothesis<sup>33</sup> can be explained by a putative glucose-mediated swell sensing function of the *SWELL1*/LRRC8 channel complex in  $\beta$ -cells. Indeed, our data are consistent with a model in which *SWELL1* is a required component of a swell-activated depolarizing  $\text{Cl}^-$  channel that

activates in response to glucose-stimulated  $\beta$ -cell swelling and is required for membrane depolarization, VGCC activation,  $\text{Ca}^{2+}$ -mediated insulin vesicle fusion and insulin secretion. In this model, the hyperpolarizing  $\text{K}^+$  conductances<sup>4-10</sup> act as a “brakes” on  $\beta$ -cell excitability and insulin secretion, while SWELL1-mediated VRAC is the “accelerator” - promoting  $\beta$ -cell excitability in response to glucose-mediated  $\beta$ -cell swelling. Overall, these data suggest that  $\beta$ -cell SWELL1 acts as a glucose sensor by coupling  $\beta$ -cell swelling to  $\beta$ -cell depolarization - a form of swell-activation or swell-secretion coupling - to potentiate glucose-stimulated insulin secretion. In the broader context of our findings on SWELL1 signaling in the adipocyte<sup>32</sup>, these data suggest that SWELL1 coordinately regulates both insulin secretion and insulin sensitivity<sup>32</sup> in response to a nutrient load, highlighting the importance SWELL1 in the regulation of systemic glucose metabolism.

## AUTHOR CONTRIBUTIONS

Conceptualization, R.S.; Methodology, C.K., S.B.S., A.W.N., A.M., Y.Z., L.X., S.K.G., S.P. Y.G. R.S.; Formal Analysis, C.K., R.S.; Investigation, C.K., S.S., A.M., S.P., Y.G.; Resources, R.S., A.W.N.; Writing – Original Draft, R.S., Writing – Review & Editing, R.S., C.K., S.B.S, A.W.N.; Visualization, C.K., R.S.; Supervision, R.S.; Funding Acquisition, R.S.

## ACKNOWLEDGMENTS

We thank Dr. John Engelhardt for sharing human islets obtained from the Integrated Islet Distribution Program (IIDP) and Dr. Yumi Imai sharing human islets obtained from Prodo Laboratories. We thank Shanming Hu for assisting with mouse islet isolations and Dr. Robert Tsushima for thoughtful reading of the manuscript and comments. This work was supported by grants from the NIH NIDDK 1R01DK106009 (R.S.), R01DK097820 (A.W.N.), R24DK96518 (A.W.N.) and the Roy J. Carver Trust (R.S.).



# **Figure 1. *SWELL1* mediates VRAC in MIN6 cells and primary mouse and human pancreatic $\beta$ -cells**

**a**, mCherry fluorescence of the mouse insulinoma cell line (MIN6) transduced with an adenovirus expressing a short-hairpin RNA directed to *SWELL1* (sh*SWELL1*-mCherry). **b**, *SWELL1* Western blot in MIN6 cells transduced with sh*SWELL1* compared to scrambled short-hairpin RNA (shSCR).  $\beta$ -actin loading control (Supplementary Fig. 5 for full blots). **c**, Current-voltage relationship of VRAC in MIN6 cells at baseline (black) and after hypotonic swelling (Hypo, 210 mOsm, blue) after adenoviral transduction with shSCR (left) and sh*SWELL1* (right). **d**, Mean current inward and outward densities at +100 and -100 mV ( $n_{\text{shSCR}} = 3$  cells;  $n_{\text{shSWELL1}} = 4$  cells). **e**, Bright-field, GFP, mCherry and merged images of freshly dispersed primary  $\beta$ -cells from *SWELL1*<sup>fl/fl</sup> mouse islets co-transduced with Ad-RIP1-GFP and Ad-Cre-mCherry. **(f-g)**, Current-time relationship **(f)** and current-voltage relationship **(g)** of swell-activated VRAC in wild-type (WT: Ad-mCherry/*SWELL1*<sup>fl/fl</sup>) and *SWELL1* knockout (KO: Ad-Cre-mCherry/*SWELL1*<sup>fl/fl</sup>) mouse primary  $\beta$ -cells. **(h)** Mean current inward and outward densities at +100 and -100 mV ( $n = 5$  cells, each group). **(i)** Bright-field, GFP, mCherry and merged images of freshly dispersed primary  $\beta$ -cells from human islets co-transduced with Ad-RIP1-GFP and Ad-sh*SWELL1*-mCherry. **(j)** Current-time relationship and **(k)** current-voltage relationship of swell-activated VRAC in WT and *SWELL1* knockdown primary human  $\beta$ -cells. **(l)** Mean current inward and outward densities at +100 and -100 mV ( $n_{\text{shSCR}} = 5$  cells;  $n_{\text{shSWELL1}} = 10$  cells). Ramp protocol is from +100 mV to -100 mV (ramp duration: 600 ms, holding potential: 0 mV). Error bars in d, h, and l denote  $\pm$  s.e.m. \*  $P < 0.05$ ; \*\* $P < 0.01$ ; \*\*\*  $P < 0.001$ , unpaired t-test.

# **Figure 2. $\beta$ -cell VRAC is activated by physiological swelling in response to glucose stimulation.**

**a-b**, Cross-sectional area of primary WT ( $n = 12$ ) and *SWELL1* KO ( $n = 7$ ) murine  $\beta$ -cells **(a)** and WT ( $n = 9$ ) and *SWELL1* KD ( $n = 8$ ) human  $\beta$ -cells **(b)** in response to glucose-stimulation (1, 16.7, 1 mM glucose). **c-d**, Murine primary  $\beta$ -cell VRAC over time **(c)** and current-voltage relationship **(d)** with

229 DCPIB inhibition (10  $\mu$ M). **e-f**, Human primary  $\beta$ -cell VRAC over time (**e**) and current-voltage  
230 relationship (**f**) with DCPIB inhibition (10  $\mu$ M). Recordings in **c-f** performed at 35-37°C in perforated-  
231 patch configuration. In (a), \*\*P < 0.01 vs 0 min in WT, paired t-test; \$P < 0.05 vs 0 min in SWELL1 KO,  
232 paired-test; #P < 0.05 WT vs SWELL1 KO, unpaired t-test. In (b), \*P < 0.05 vs 0 min in WT, paired t-  
233 test; \$P < 0.05 vs 0 min in SWELL1 KD, paired-test; ###P < 0.01 WT vs SWELL1 KD, unpaired t-test.

234

235 **Figure 3. SWELL1-mediated VRAC is required for both glucose- and hypotonic swelling induced**  
236 **Ca<sup>2+</sup> signaling in  $\beta$ -cells.**

237 **a**, SWELL1 Western blot in WT and CRISPR/Cas9-mediated SWELL1 KO MIN6 cell lines  
238 (Supplementary Fig. 5 for full blots). **b**, Current-voltage plots of SWELL1-mediated current in response  
239 to hypotonic swelling in WT and SWELL1 KO MIN6 cells confirm complete ablation of hypotonic  
240 swelling stimulated VRAC in SWELL1 KO MIN6 cells. (**c-d**) Fura-2 Ca<sup>2+</sup> transients in WT (**c**) and  
241 SWELL1 KO (**d**) MIN6 cells in response to 30 mM glucose-stimulation (basal 1 mM glucose). 40 mM  
242 KCl stimulation confirms cell viability and excitability. (**e**) Mean peak Fura-2 ratio in glucose-stimulated  
243 WT (n = 34) and SWELL1 KO (n = 36) MIN6 cells. (**f-g**) Fura-2 Ca<sup>2+</sup> transients in WT (**f**) and SWELL1  
244 KO (**g**) MIN6 cells in response to swell-stimulation (210 mOsm; isotonic 300 mOsm). (**h**) Mean peak  
245 Fura-2 ratio in swell-stimulated WT (n = 42) and SWELL1 KO (n = 26) MIN6 cells. (**i**) Ad-RIP1-  
246 GCaMP6s transduced SWELL1<sup>fl/fl</sup> murine islet. (**j-k**) GCaMP6s Ca<sup>2+</sup> transients in WT (J, Ad-RIP1-  
247 GCaMP6s/SWELL1<sup>fl/fl</sup>) and SWELL1 KO (K, Ad-RIP1-Cre-P2A-GCaMP6s/SWELL1<sup>fl/fl</sup>) primary murine  
248  $\beta$ -cell in response to 16.7 mM glucose-stimulation (basal 1 mM glucose). 40 mM KCl stimulation. Insets  
249 show  $\beta$ -cell fluorescence images at the indicated times in the experiment. (**l**) Mean peak values of  
250 GCaMP6s Ca<sup>2+</sup> transients from Ad-RIP1-GCaMP6s/SWELL1<sup>fl/fl</sup> (n = 14) and Ad-RIP1-Cre-P2A-  
251 GCaMP6s/SWELL1<sup>fl/fl</sup> (n = 10). (**m**) Ad-RIP1-GCaMP6s transduced human islet. (**o-p**) GCaMP6s Ca<sup>2+</sup>  
252 transients in human primary  $\beta$ -cell co-transduced with Ad-RIP1-GCaMP6s+Ad-shSCR-mCherry (**o**) and  
253 Ad-RIP1-GCaMP6s+Ad-shSWELL1-mCherry (**p**) in response to 16.7 mM glucose-stimulation (basal 1  
254 mM glucose). 40 mM KCl stimulation. (**q**) Mean peak values of GCaMP6s Ca<sup>2+</sup> transients from shSCR  
255 (n = 6) and shSWELL1 (n = 8). Error bars represent mean  $\pm$  SEM, \*\*p < 0.01, \*\*\*p < 0.001.

256

257 **Figure 4. .  $\beta$ -cell *SWELL1* is required for glucose-stimulated insulin secretion *in vitro* and *in vivo***

258 **a**, Glucose-stimulated insulin secretion (GSIS) in WT and *SWELL1* KO MIN6 cells in response to 1, 5.5  
259 and 30 mM glucose (n = 3, each). **b**, Total insulin content normalized to total MIN6 cell protein content  
260 (n = 3, each). **c**, Representative image of Ad-RIP1-Cre-RFP transduced mouse islet. **d**, GSIS in WT  
261 (Ad-RIP1-RFP/*SWELL1*<sup>fl/fl</sup>) and  $\beta$ -cell targeted *SWELL1* KO (Ad-RIP1-Cre-RFP/*SWELL1*<sup>fl/fl</sup>) islets.  
262 Insulin secretion is expressed as percentage of the total insulin content (n = 4, each). **e**, Total insulin  
263 content of WT and  $\beta$ -cell targeted *SWELL1* KO islets (n = 4, each). **(f)** Tamoxifen-inducible  $\beta$ -cell-  
264 targeted *SWELL1* inactivation using *Ins1Cre*<sup>ERT2</sup> mouse crossed with *SWELL1*<sup>fl/fl</sup> mice (KO  
265 *Ins1Cre*<sup>ERT2</sup>). **(g)** PCR across *SWELL1* Exon 3 in genomic DNA extracted from pancreas, liver and  
266 adipose tissues of a KO *Ins1Cre*<sup>ERT2</sup> mouse treated with (+) and without (-) tamoxifen. *Cre*-mediated  
267 *SWELL1* recombination results in a 426 bp amplicon. **(h)** Current-voltage relationship of swell-activated  
268 VRAC in mouse primary  $\beta$ -cells isolated from *SWELL1*<sup>fl/fl</sup> +tamoxifen (WT) and KO *Ins1Cre*<sup>ERT2</sup>  
269 +tamoxifen (KO *Ins1Cre*<sup>ERT2</sup>). **(i)** Mean inward and outward current densities at +100 and -100 mV (n =  
270 4 cells for WT and n = 10 cells for KO *Ins1Cre*<sup>ERT2</sup>). **(j)** Glucose-stimulated insulin secretion in WT and  
271 KO *Ins1Cre*<sup>ERT2</sup> mice in response to 2g/kg glucose in the first 30 min (n = 8, male, for each group).  
272 Error bars represent mean  $\pm$  SEM, \* p < 0.05; \*\*p < 0.01; \*\*\*p < 0.001 vs. WT; ns: not statistically  
273 significant, one-way ANOVA for in-group comparison, unpaired t-test for between-group comparison.  
274 For **(j)**, non-parametric one-way ANOVA (Kruskal Wallis test) was performed. Error bars represent  
275 mean  $\pm$  SEM, \* p < 0.05; \*\*p < 0.01; \*\*\*p < 0.001 vs. WT (30 mM glucose); ns: not statistically  
276 significant

277

278 **Supplementary Figure 1: Fluorescence images of adenovirally transduced murine and human**  
279 **islets**

280 **a**, Murine islets freshly isolated from *SWELL1*<sup>fl/fl</sup> mice, cultured (BF: Bright field) and then co-  
281 transduced with Ad-RIP1-GFP (GFP) and Ad-CMV-mCherry (top, cytosolic mCherry: Control) or Ad-  
282 CMV-Cre-mCherry (bottom: nuclear-localized Cre-mCherry fusion protein; *SWELL1* KO).

**b**, Human islets cultured (BF: Bright field) and then co-transduced with Ad-RIP1-GFP (GFP) and Ad-U6-shSCR-mCherry (top, mCherry: Control) or Ad-U6-shSWELL1-mCherry (bottom: mCherry; SWELL1 KD). Scale bar represents 50  $\mu$ m.

## **Supplementary Figure 2: MIN6 $\beta$ -cell VRAC is activated by glucose stimulation**

Glucose-stimulated VRAC recorded in patch-clamped MIN6  $\beta$ -cell upon application of 30 mM glucose from a basal glucose of 1 mM. Recordings performed at 35-37°C in perforated-patch configuration.

## **Supplementary Figure 3: CRISPR/cas9-mediated *SWELL1* ablation in MIN6 cells**

**a**, Guide RNA sequences targeting exon 3 of the *SWELL1* gene were used in combinations of either 1A+2B or 2B+3C to generate KO1 and KO2 clones respectively. Upon interacting with *cas9* enzyme and corresponding guide pairs the target region undergoes non-homologous end joining (NHEJ) repair. This results in the deletion of DNA base pairs in-between the two target guide sites. Using specific primers for the regions flanking the two target guide sites, the wildtype, WT (non-transfected) cells generate a fragment of size 661 and 879 bps for the 1A/2B and 2B/3C sites respectively, upon PCR amplification. The KO1 and KO2 clones (transfected) generate a deleted DNA fragment of size approximately 410 and 639 bps for the 1A/2B and 2B/3C sites respectively. In the agarose gel image, the DNA fragment sizes are indicated in base-pairs (bp) and 'L' indicates ladder. **b**, Western-blot of *SWELL1* protein in WT (non-transfected, WT1, WT2) and multiple *SWELL1* KO MIN6 clones (KO1-5).  $\beta$ -actin is used as the loading control (Supplementary Fig. 5 for full blots).

## **Supplementary Figure 4: Glucose and hypotonic swell-stimulated $\text{Ca}^{2+}$ signaling is dependent on VGCC and elevated intracellular chloride in $\beta$ -cells**

**a**, Fura-2  $\text{Ca}^{2+}$  transients in WT MIN6 cells in response to 30 mM glucose-stimulation (basal 1 mM glucose) in the presence of VGCC blocker nifedipine (10  $\mu$ M). **b**, Mean peak Fura-2 ratio from **a** ( $n = 16$  cells). **c**, Fura-2  $\text{Ca}^{2+}$  transients in WT MIN6 cells in response to hypotonic swelling (210 mOsm;

isotonic 300 mOsm) in the presence of VGCC blocker nifedipine (10  $\mu$ M). **d**, Mean peak Fura-2 ratio from **c** (n = 43 cells). **e**, Fura-2  $\text{Ca}^{2+}$  transients in WT MIN6 cells in response to 30 mM glucose-stimulation (basal 1 mM glucose) in the presence of NKCC1 inhibitor, bumetanide (10  $\mu$ M). **f**, Mean peak Fura-2 ratio from **e** (n = 46 cells). **g**, GCaMP6s  $\text{Ca}^{2+}$  transients in WT (Ad-RIP1-GCaMP6s/SWELL1<sup>fl/fl</sup>) primary murine  $\beta$ -cell in response to 16.7 mM glucose-stimulation (basal 1 mM glucose) in the presence of NKCC1 inhibitor, bumetanide (10  $\mu$ M). **h**, Mean peak values of GCaMP6s  $\text{Ca}^{2+}$  transients from **g** (n = 7 cells). In all experiments, 40 mM KCl stimulation confirms cell viability and excitability. Error bars represent mean  $\pm$  s.e.m., \*\*p < 0.01; \*\*\*p < 0.001; ns: not statistically significant.

## References

1. Yang, S.N. *et al.* Ionic mechanisms in pancreatic beta cell signaling. *Cell Mol Life Sci* **71**, 4149-4177 (2014).
2. Rorsman, P. & Braun, M. Regulation of insulin secretion in human pancreatic islets. *Annu Rev Physiol* **75**, 155-179 (2013).
3. Rorsman, P., Eliasson, L., Kanno, T., Zhang, Q. & Gopel, S. Electrophysiology of pancreatic beta-cells in intact mouse islets of Langerhans. *Prog Biophys Mol Biol* **107**, 224-235 (2011).
4. Nichols, C.G. KATP channels as molecular sensors of cellular metabolism. *Nature* **440**, 470-476 (2006).
5. Ashcroft, F.M. & Rorsman, P. K(ATP) channels and islet hormone secretion: new insights and controversies. *Nat Rev Endocrinol* **9**, 660-669 (2013).
6. MacDonald, P.E. *et al.* Members of the Kv1 and Kv2 voltage-dependent K(+) channel families regulate insulin secretion. *Molecular endocrinology* **15**, 1423-1435 (2001).
7. Jacobson, D.A. *et al.* Kv2.1 ablation alters glucose-induced islet electrical activity, enhancing insulin secretion. *Cell metabolism* **6**, 229-235 (2007).
8. Tamarina, N.A., Kuznetsov, A., Fridlyand, L.E. & Philipson, L.H. Delayed-rectifier (KV2.1) regulation of pancreatic beta-cell calcium responses to glucose: inhibitor specificity and modeling. *American journal of physiology. Endocrinology and metabolism* **289**, E578-585 (2005).
9. Dadi, P.K., Vierra, N.C. & Jacobson, D.A. Pancreatic beta-cell-specific ablation of TASK-1 channels augments glucose-stimulated calcium entry and insulin secretion, improving glucose tolerance. *Endocrinology* **155**, 3757-3768 (2014).
10. Vierra, N.C. *et al.* Type 2 Diabetes-Associated K<sup>+</sup> Channel TALK-1 Modulates beta-Cell Electrical Excitability, Second-Phase Insulin Secretion, and Glucose Homeostasis. *Diabetes* **64**, 3818-3828 (2015).
11. Qiu, Z. *et al.* SWELL1, a Plasma Membrane Protein, Is an Essential Component of Volume-Regulated Anion Channel. *Cell* **157**, 447-458 (2014).
12. Voss, F.K. *et al.* Identification of LRRC8 heteromers as an essential component of the volume-regulated anion channel VRAC. *Science* **344**, 634-638 (2014).
13. Syeda, R. *et al.* LRRC8 Proteins Form Volume-Regulated Anion Channels that Sense Ionic Strength. *Cell* **164**, 499-511 (2016).
14. Zhang, Y. *et al.* SWELL1 is a regulator of adipocyte size, insulin signaling and glucose homeostasis. *Nature cell biology* **Accepted, in press** (2017).

15. Best, L. Glucose-induced electrical activity in rat pancreatic beta-cells: dependence on intracellular chloride concentration. *J Physiol* **568**, 137-144 (2005).
16. Best, L., Miley, H.E. & Yates, A.P. Activation of an anion conductance and beta-cell depolarization during hypotonically induced insulin release. *Exp Physiol* **81**, 927-933 (1996).
17. Best, L., Sheader, E.A. & Brown, P.D. A volume-activated anion conductance in insulin-secreting cells. *Pflugers Arch* **431**, 363-370 (1996).
18. Miley, H.E., Sheader, E.A., Brown, P.D. & Best, L. Glucose-induced swelling in rat pancreatic beta-cells. *J Physiol* **504** ( Pt 1), 191-198 (1997).
19. Planells-Cases, R. *et al.* Subunit composition of VRAC channels determines substrate specificity and cellular resistance to Pt-based anti-cancer drugs. *EMBO J* **34**, 2993-3008 (2015).
20. Sheader, E.A., Brown, P.D. & Best, L. Swelling-induced changes in cytosolic [Ca<sup>2++</sup>] in insulin-secreting cells: a role in regulatory volume decrease? *Mol Cell Endocrinol* **181**, 179-187 (2001).
21. Liedtke, W., Tobin, D.M., Bargmann, C.I. & Friedman, J.M. Mammalian TRPV4 (VR-OAC) directs behavioral responses to osmotic and mechanical stimuli in *Caenorhabditis elegans*. *Proc Natl Acad Sci U S A* **100** Suppl 2, 14531-14536 (2003).
22. Eberhardson, M., Patterson, S. & Grapengiesser, E. Microfluorometric analysis of Cl<sup>-</sup> permeability and its relation to oscillatory Ca<sup>2+</sup> signalling in glucose-stimulated pancreatic beta-cells. *Cell Signal* **12**, 781-786 (2000).
23. Sehlin, J. Interrelationship between chloride fluxes in pancreatic islets and insulin release. *Am J Physiol* **235**, E501-508 (1978).
24. Lindstrom, P., Norlund, L., Sandstrom, P.E. & Sehlin, J. Evidence for co-transport of sodium, potassium and chloride in mouse pancreatic islets. *J Physiol* **400**, 223-236 (1988).
25. Sandstrom, P.E. & Sehlin, J. Evidence for separate Na<sup>+</sup>, K<sup>+</sup>, Cl<sup>-</sup> and K<sup>+</sup>, Cl<sup>-</sup> co-transport systems in mouse pancreatic beta-cells. *Eur J Pharmacol* **238**, 403-405 (1993).
26. Sandstrom, P.E. Evidence for diabetogenic action of bumetanide in mice. *Eur J Pharmacol* **150**, 35-41 (1988).
27. Sandstrom, P.E. Bumetanide reduces insulin release by a direct effect on the pancreatic beta-cells. *Eur J Pharmacol* **187**, 377-383 (1990).
28. Magnuson, M.A. & Osipovich, A.B. Pancreas-specific Cre driver lines and considerations for their prudent use. *Cell metabolism* **18**, 9-20 (2013).
29. Strange, K., Emma, F. & Jackson, P.S. Cellular and molecular physiology of volume-sensitive anion channels. *Am J Physiol* **270**, C711-730 (1996).
30. Okada, Y. Volume expansion-sensing outward-rectifier Cl<sup>-</sup> channel: fresh start to the molecular identity and volume sensor. *Am J Physiol* **273**, C755-789 (1997).
31. Okada, Y., Sato, K. & Numata, T. Pathophysiology and puzzles of the volume-sensitive outwardly rectifying anion channel. *J Physiol* **587**, 2141-2149 (2009).
32. Zhang, Y. *et al.* SWELL1 is a regulator of adipocyte size, insulin signalling and glucose homeostasis. *Nature cell biology* (2017).
33. Best, L., Brown, P.D., Sener, A. & Malaisse, W.J. Electrical activity in pancreatic islet cells: The VRAC hypothesis. *Islets* **2**, 59-64 (2010).



**Figure 1**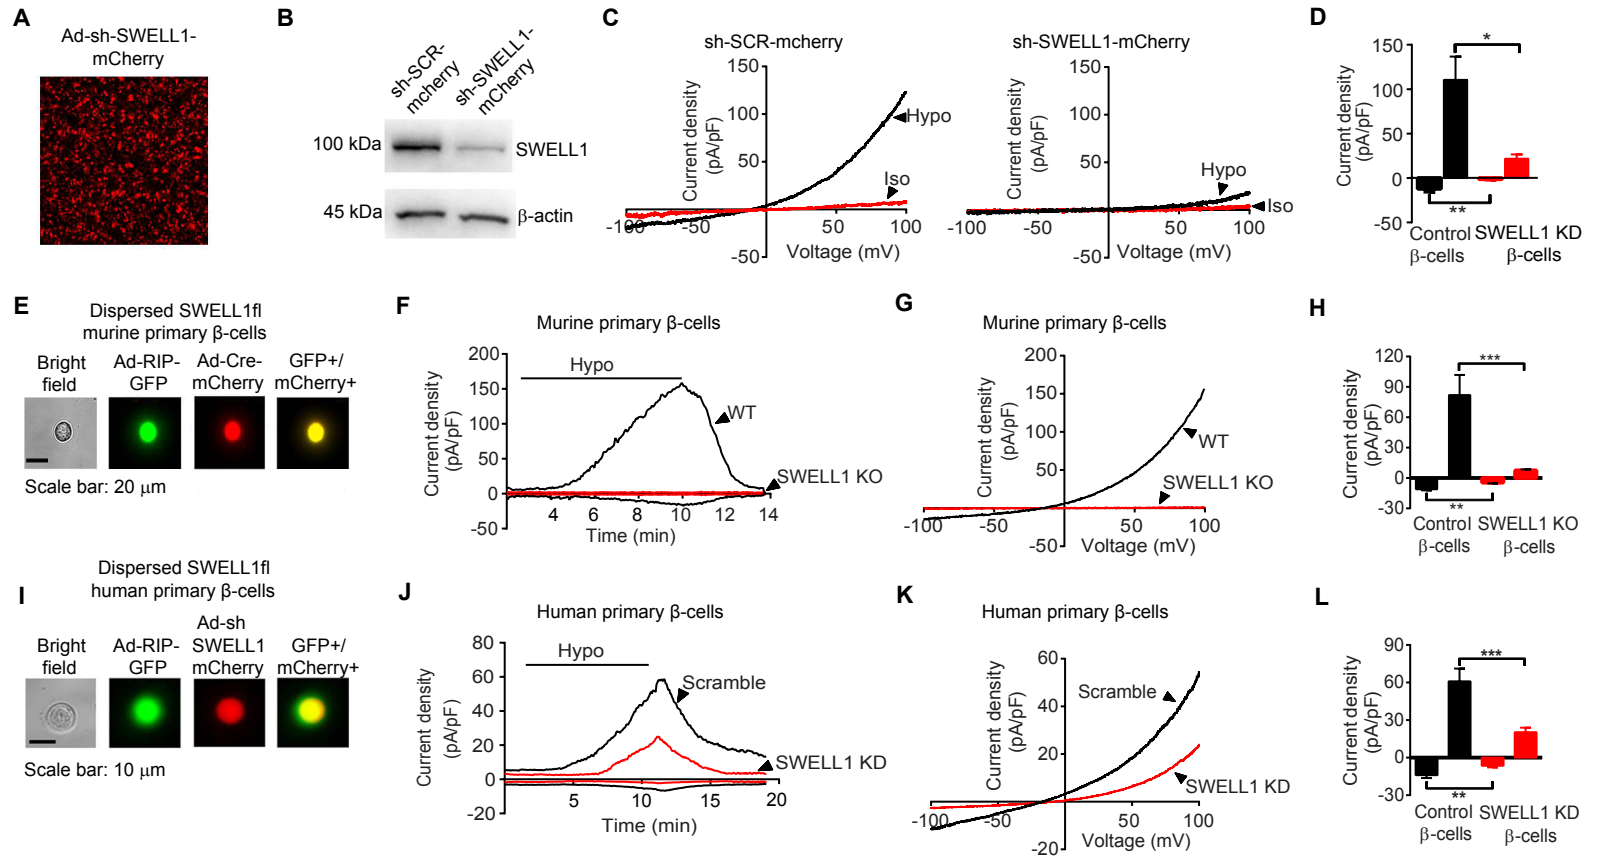

**Figure 2**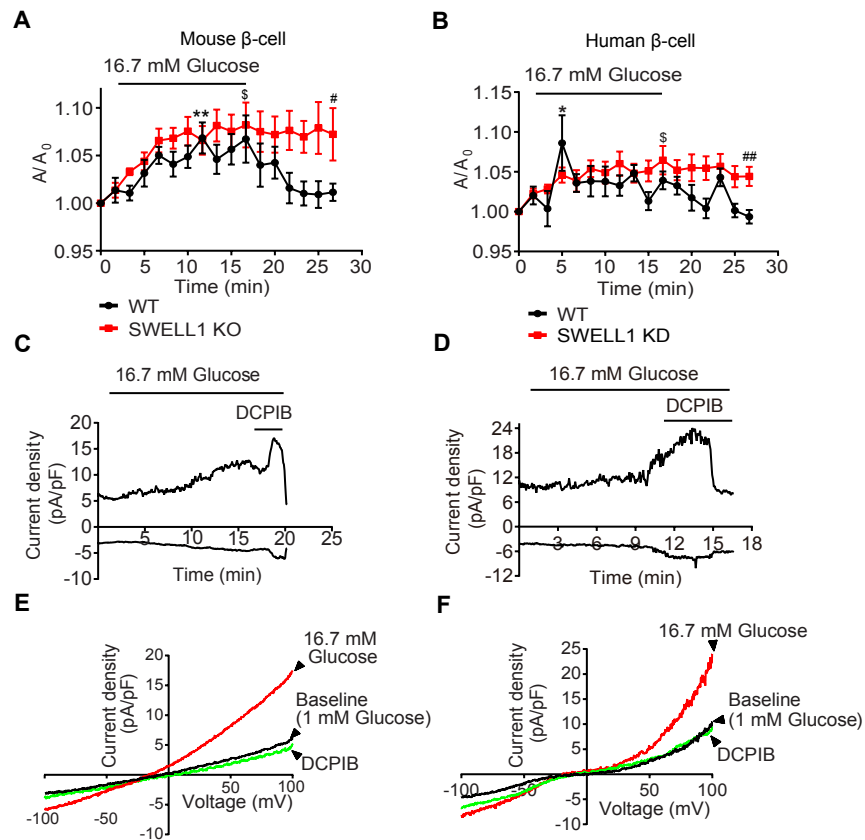



**Figure 3**

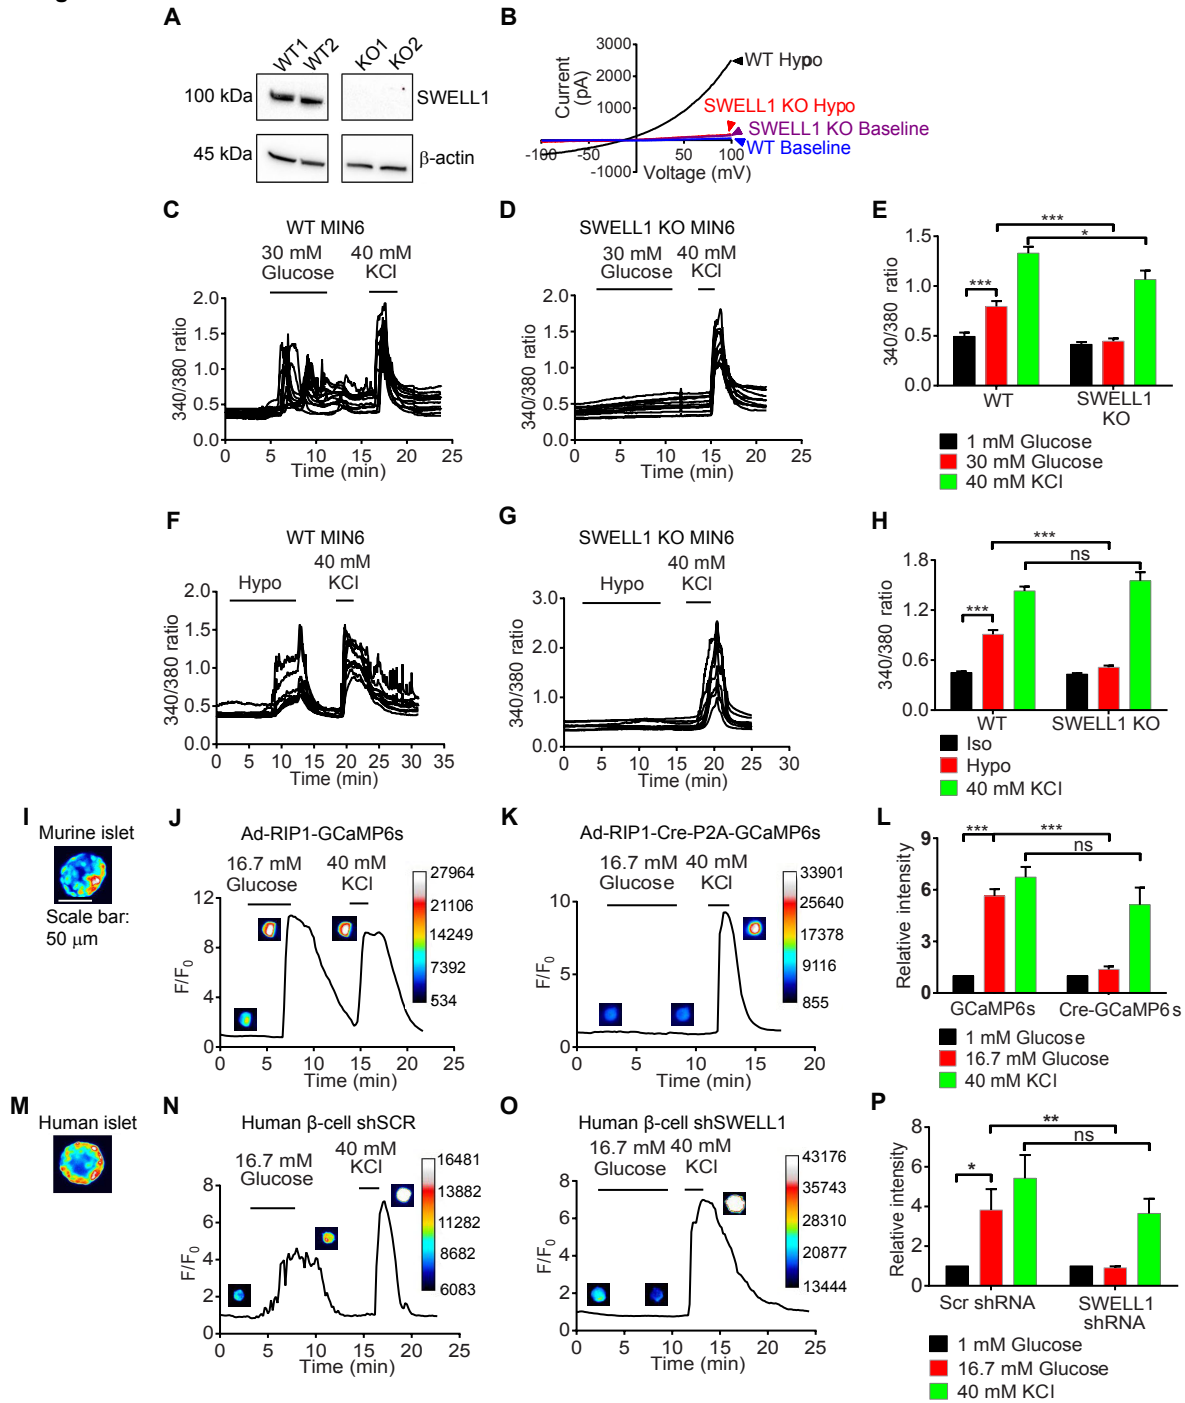

**Figure 4**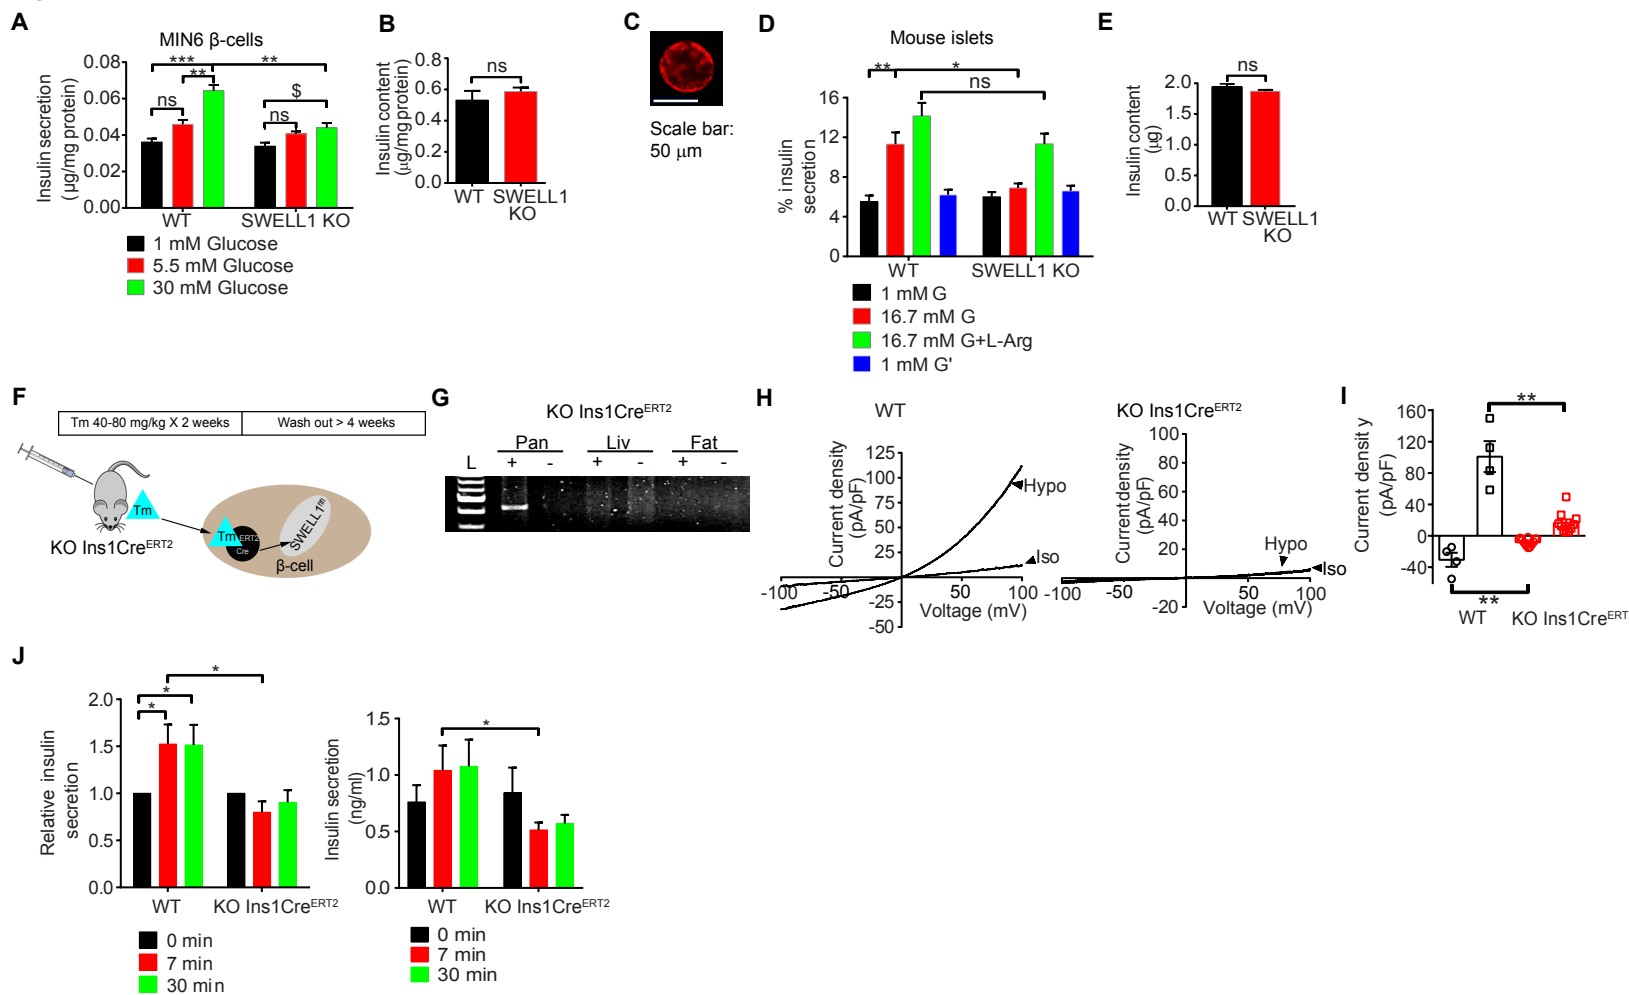

Source: https://www.biorxiv.org/content/10.1101/155093v1.full.pdf
